# Supplementary material for: A novel 3D printed type II silk fibroin/polycaprolactone mesh for the treatment of pelvic organ prolapse
Source: Royal Society of Chemistry journal article supplement (doi:10.1039/d3bm01158e), 2023-01-01
Supplement: d3bm01158e1.pdf [file d3bm01158e1.pdf]

## Supporting Information

### **A novel 3D printed type II silk fibroin / polycaprolactone mesh for the treatment of pelvic organ prolapse**

Jingya Wu<sup>1,†</sup>, Hai Yao<sup>2,†</sup>, Lili Yu<sup>2</sup>, Huawen Li<sup>1</sup>, Yan Zuo<sup>1</sup>, Wenjun Liu<sup>3</sup>, Chunye Zhang<sup>2</sup>, Caili Fu<sup>2,\*</sup> and Mubiao Liu<sup>1,\*</sup>

<sup>1</sup>Department of Gynecology, Zhuhai People's Hospital (Zhuhai Hospital Affiliated with Jinan University), Zhuhai, 519050, China

<sup>2</sup>Center For Peak of Excellence on biological Science and Food Engineering, National University of Singapore (Suzhou) Research Institute, Suzhou, 215004, China

<sup>3</sup>Department of Research and Development, Zhejiang Zhongwei Medical Research Center, Hangzhou, 310018, China

<sup>†</sup>The authors contributed to the work equally

<sup>\*</sup>Corresponding author: liumb1972@126.com, Caili.Fu@nusri.cn.

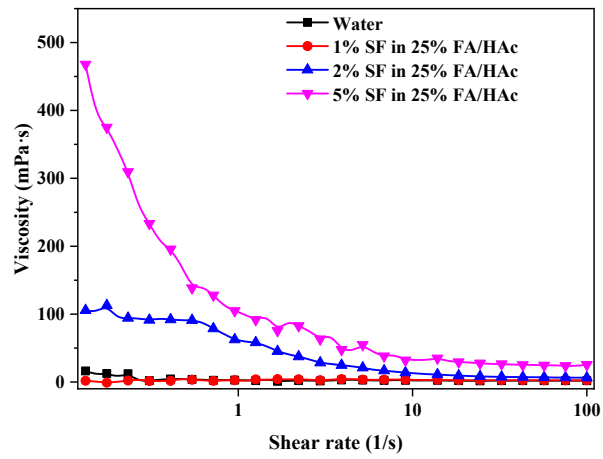

Figure S1. Ink viscosity with different SF contents (1%, 2% and 5%).

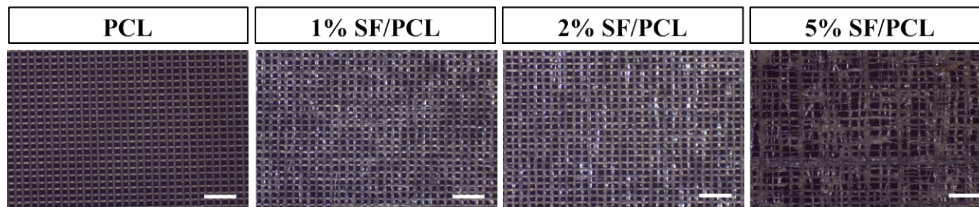

Figure S2. EHPD meshes of PCL, 1% SF/PCL, 2% SF/PCL and 5% SF/PCL (Scale bar=500 $\mu$ m).

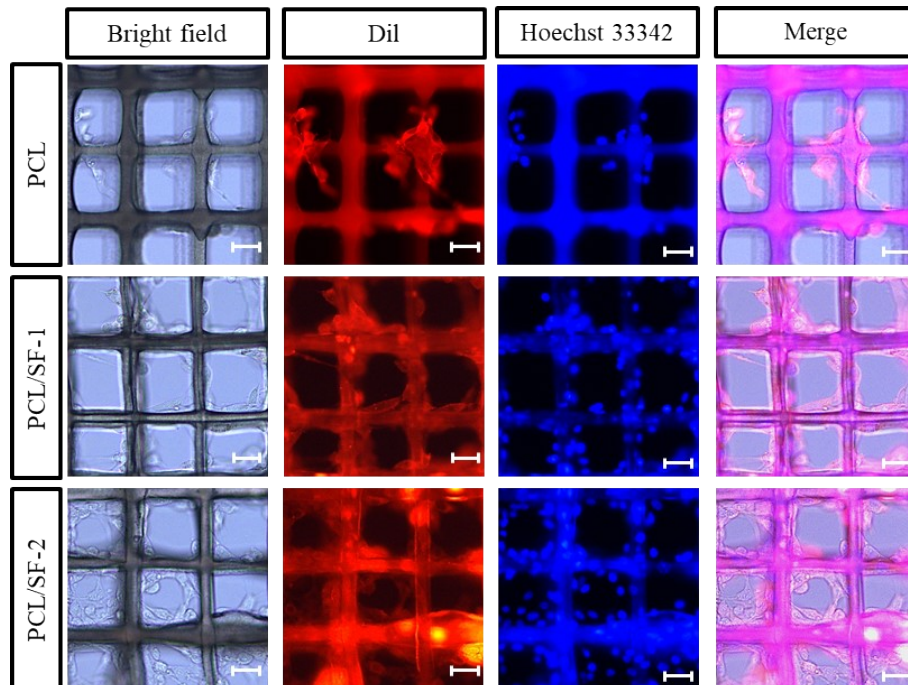

Figure S3. Fluorescent images of cell seeded in meshes after 5 days culture (Scale bar=50  $\mu$ m).

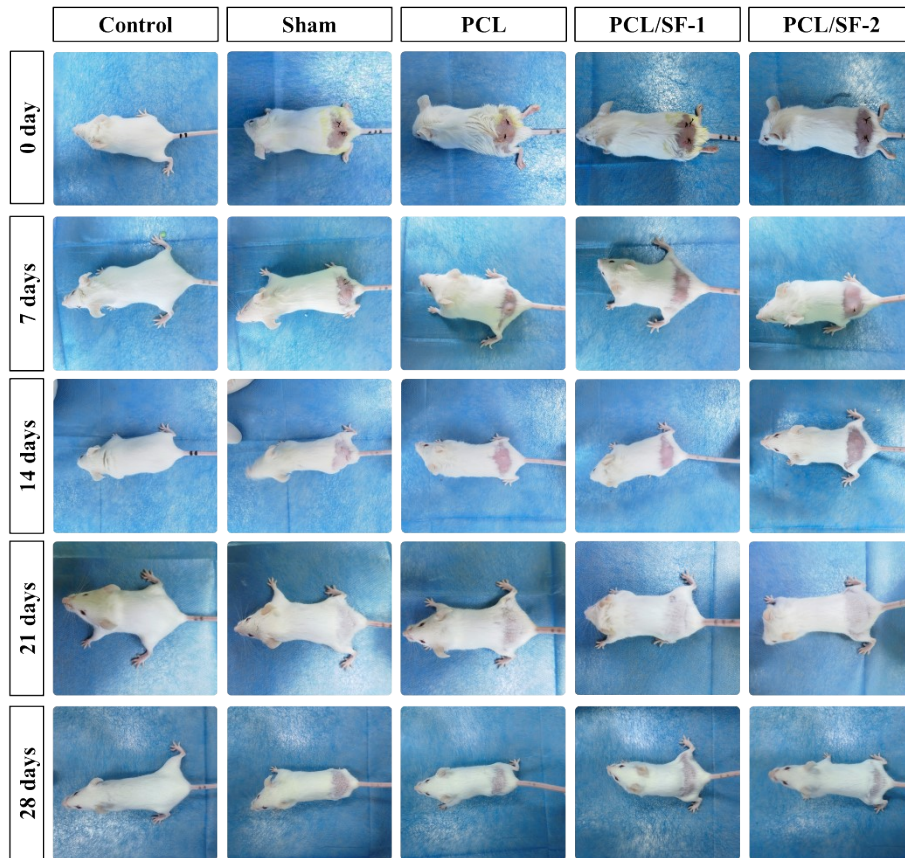

Figure S4. The images of wounds after 0, 7, 14, 21 and 28 days.

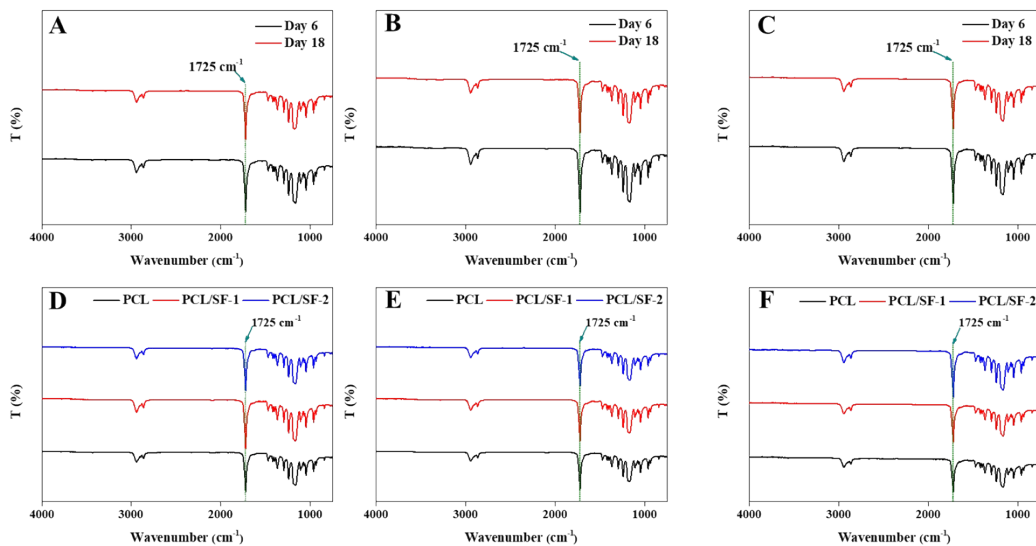

Figure S5. The structural changes in the composition of PCL and PCL/SF meshes. Infrared spectra of PCL (A), PCL/SF-1 (B) and PCL/SF-2 (C) mesh degradation in vitro on day 6 and day 18; Comparison of infrared spectra of different meshes on day 6 of in vitro degradation (D); Comparison of infrared spectra of different meshes on day 18 of in vitro degradation (E); Comparison of infrared spectra of different meshes on day 5 of cell co-culture (F).
